# Supplementary material for: Proteomic Characterization of Bacteriophage Peptides from the Mastitis Producer Staphylococcus aureus by LC-ESI-MS/MS and the Bacteriophage Phylogenomic Analysis
Source: MDPI journal article supplement (doi:10.3390/foods10040799), 2021-04-08

IRLPYYDVK 389.5571 [M+2H]<sup>2+</sup>

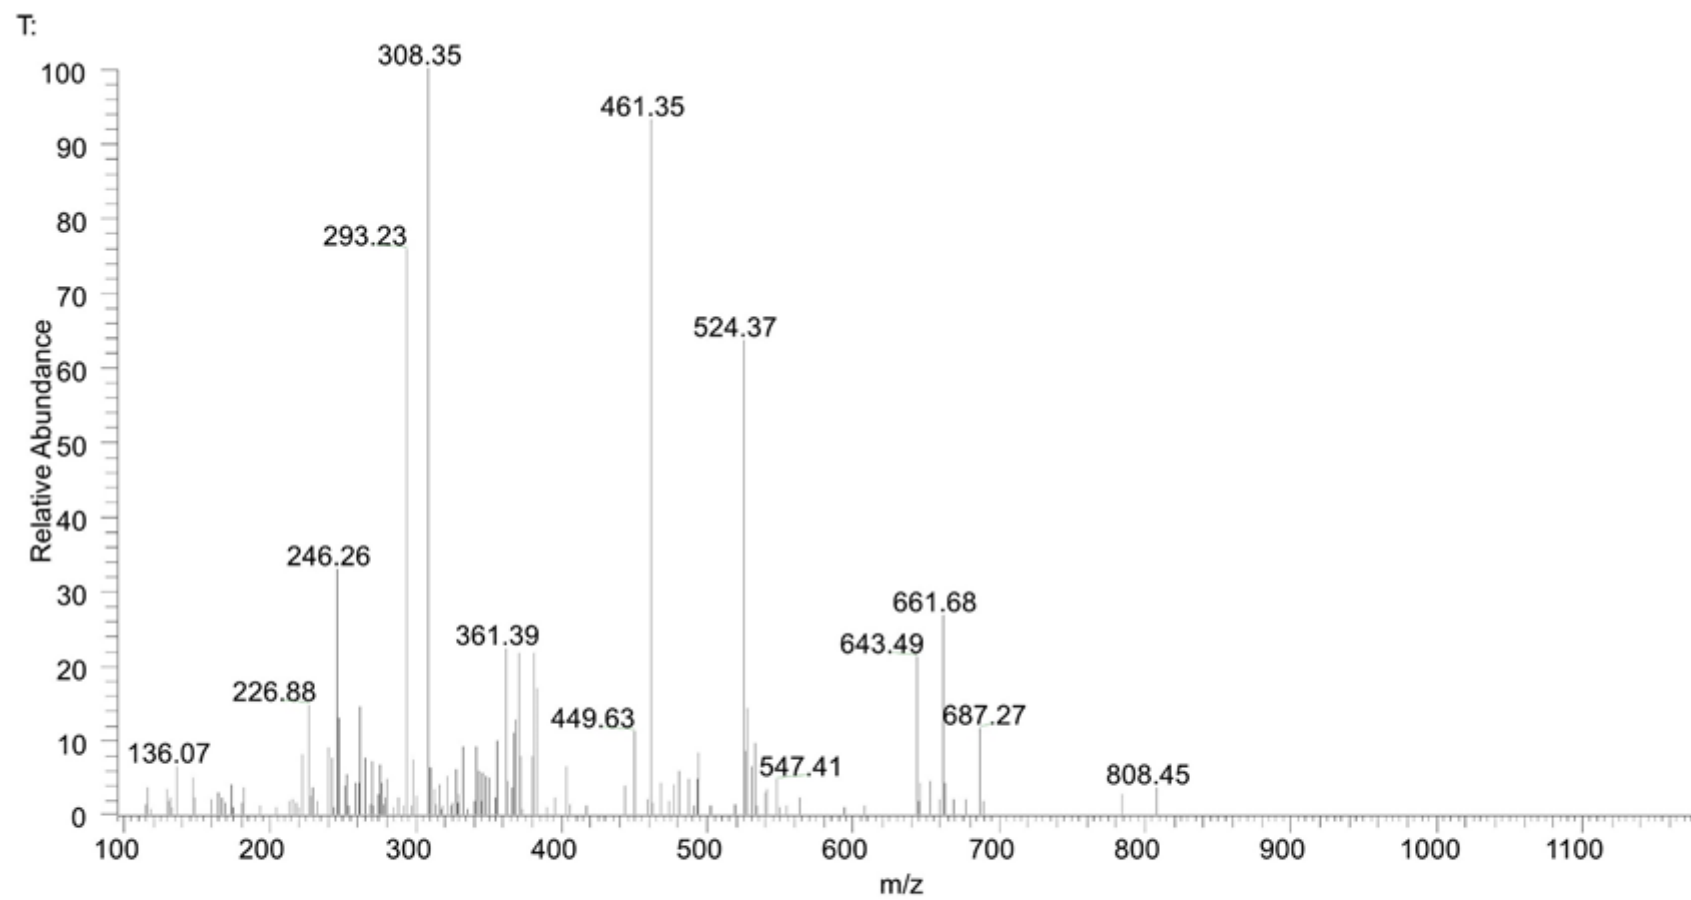

LYVGVFNPEATK 669.3586 [M+2H]<sup>2+</sup>

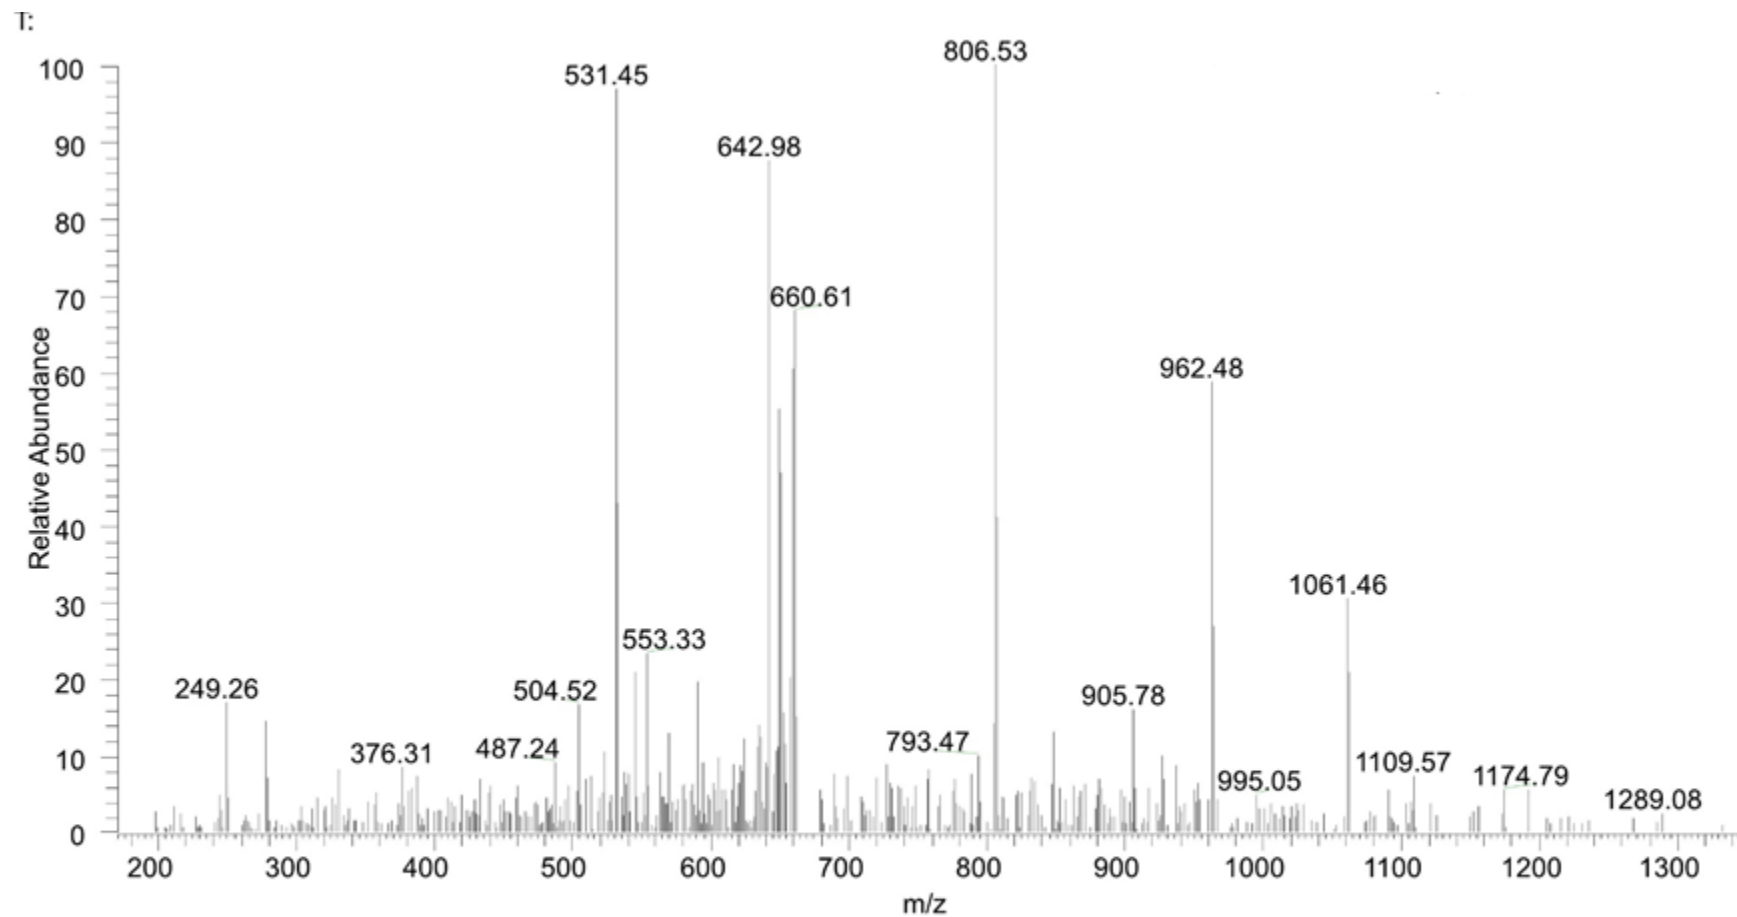

SIINGKLDSQWTVNEHK 1033.5369 [M+2H]<sup>2+</sup>

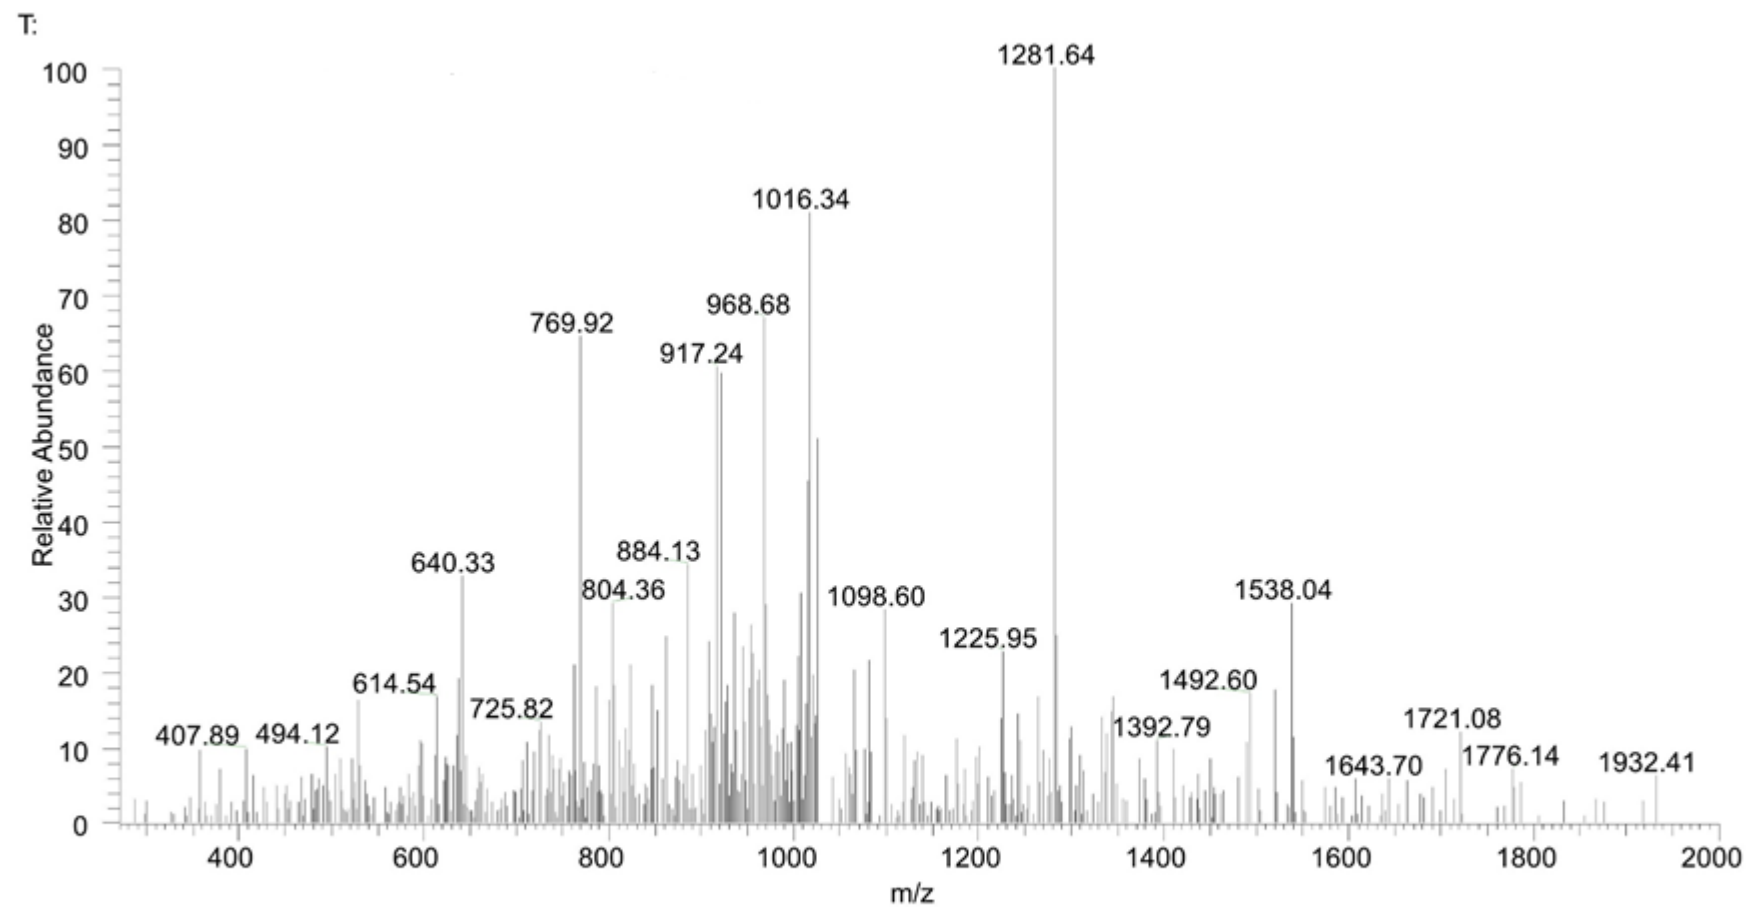

M[147.04]NDSNQGLQANPQYTIHYLSQEITR 979.7980 [M+2H]<sup>2+</sup>

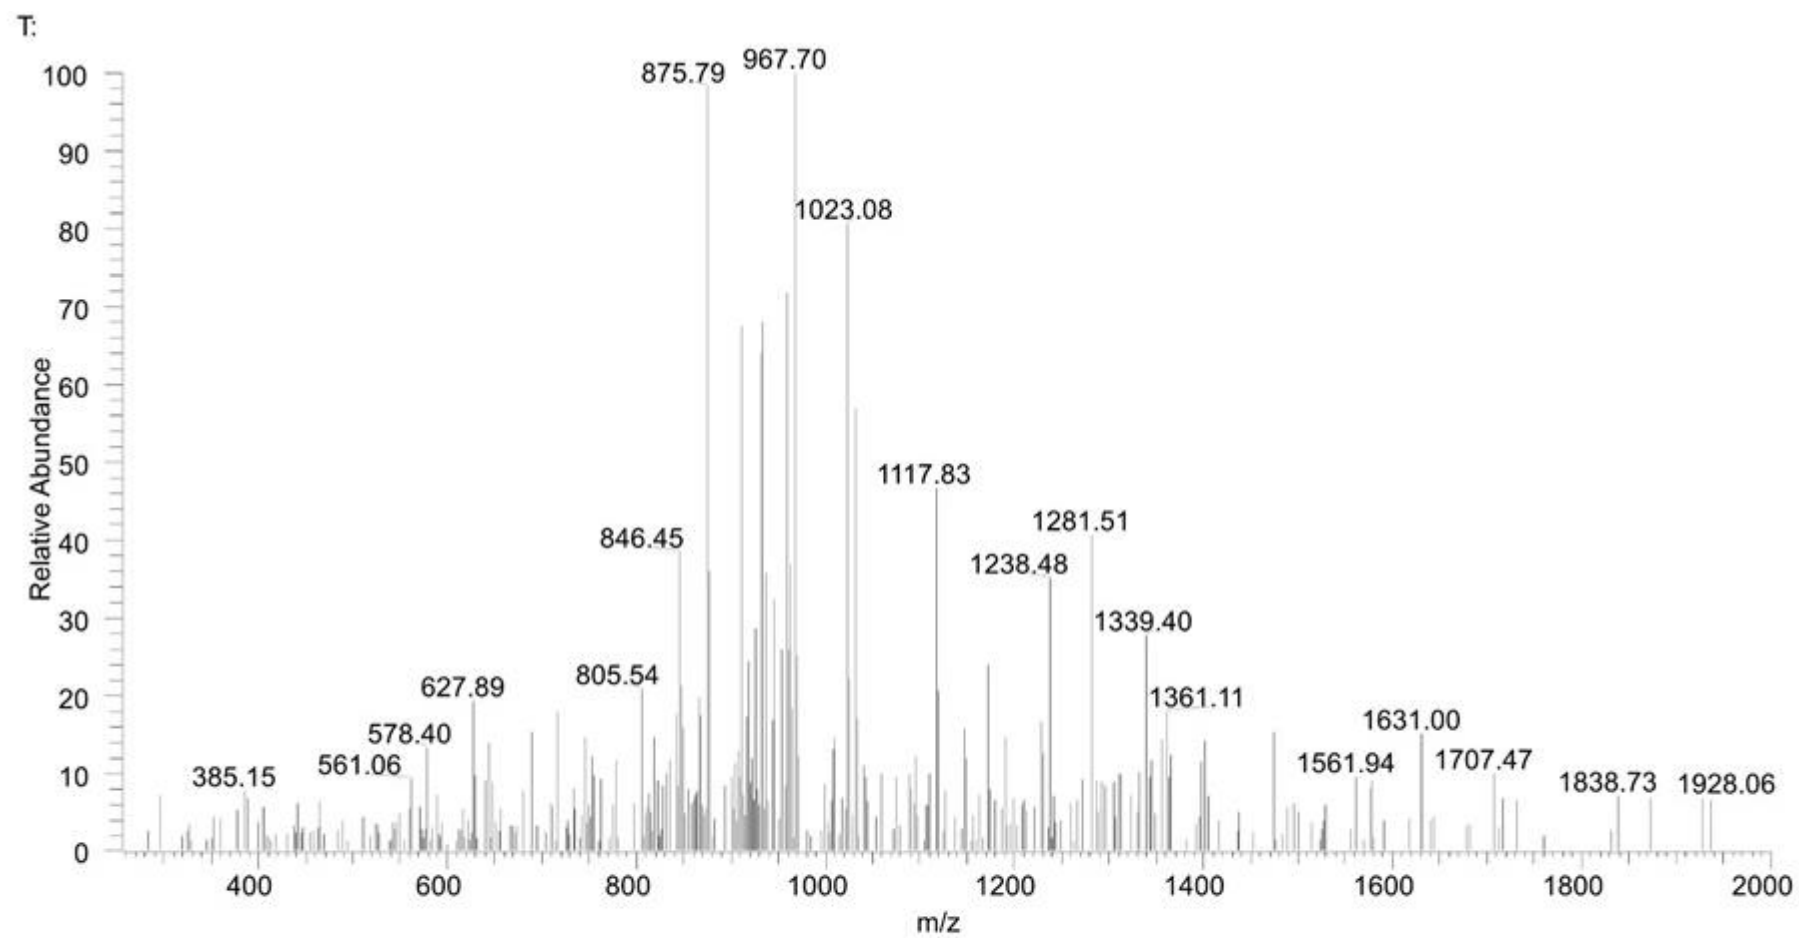

[42.01]PC[160.03]PALMNKRNSIATHR 674.3538 [M+2H]<sup>2+</sup>

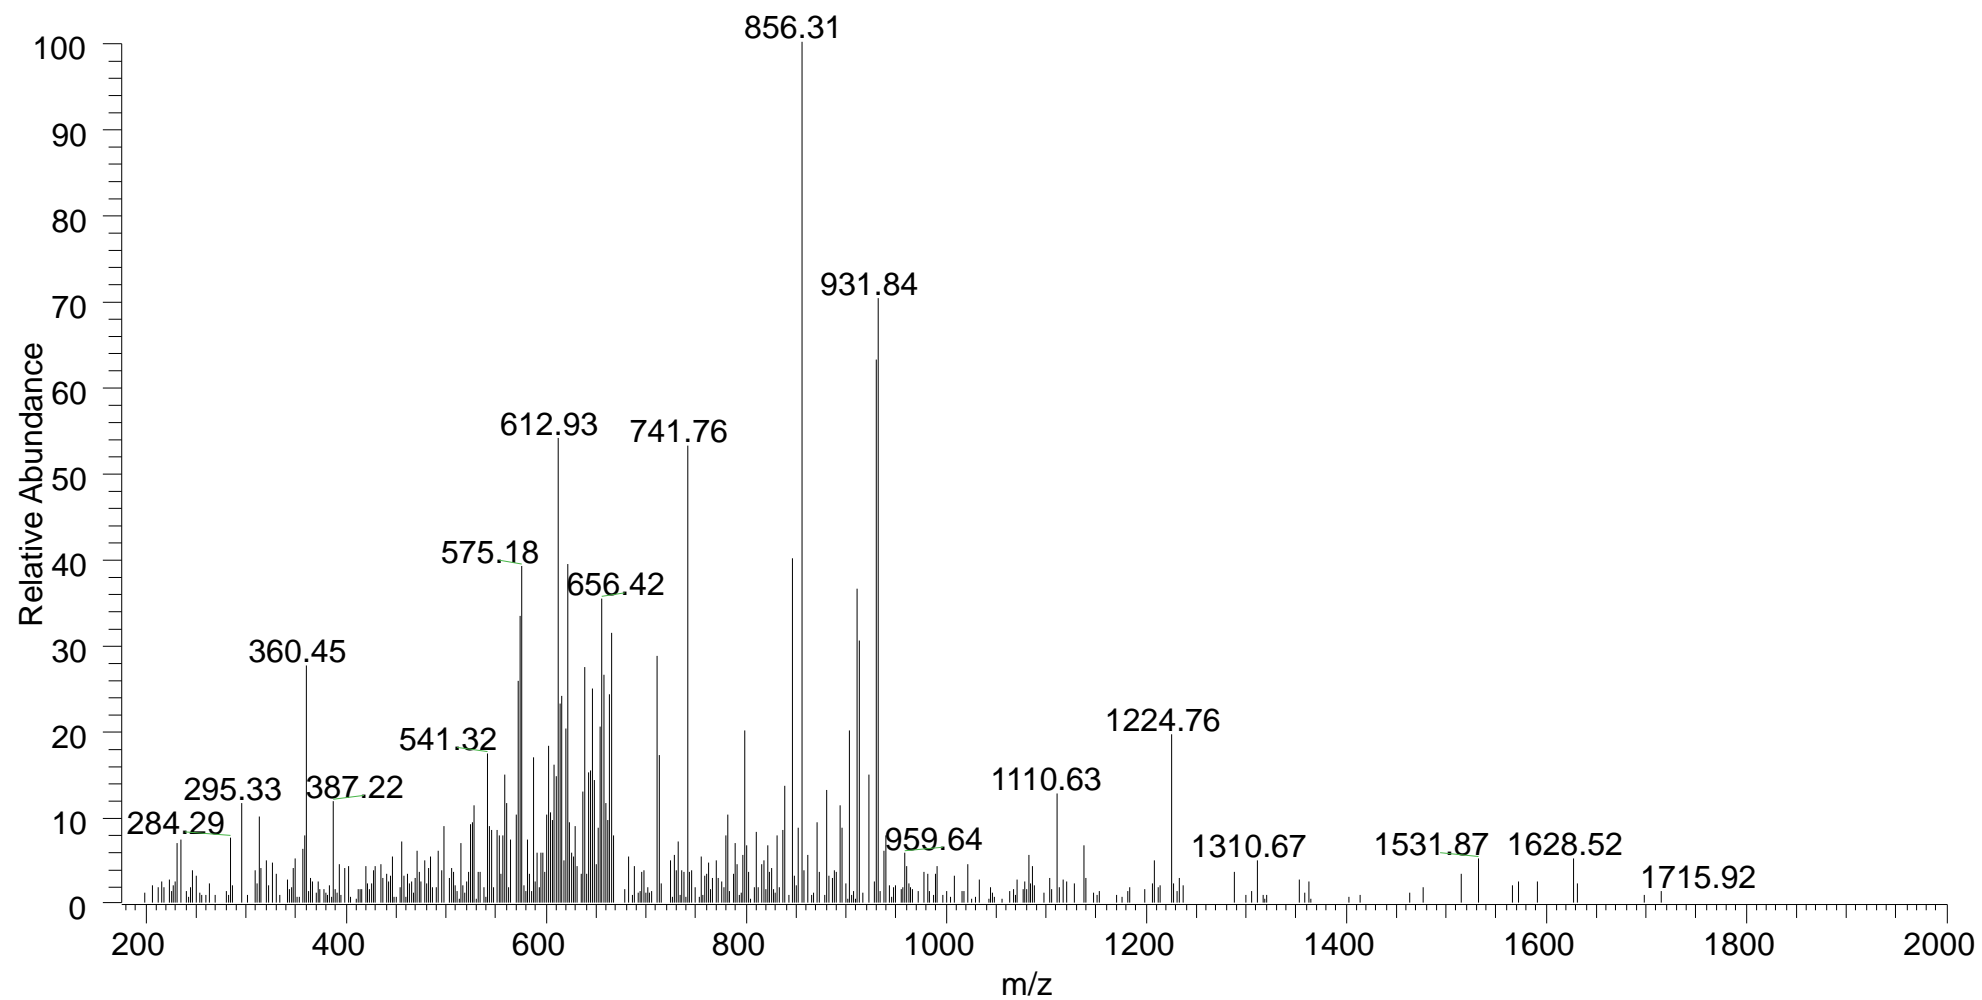

SQDSNLTPELSTKAPK 858.4500 [M+2H]<sup>2+</sup>

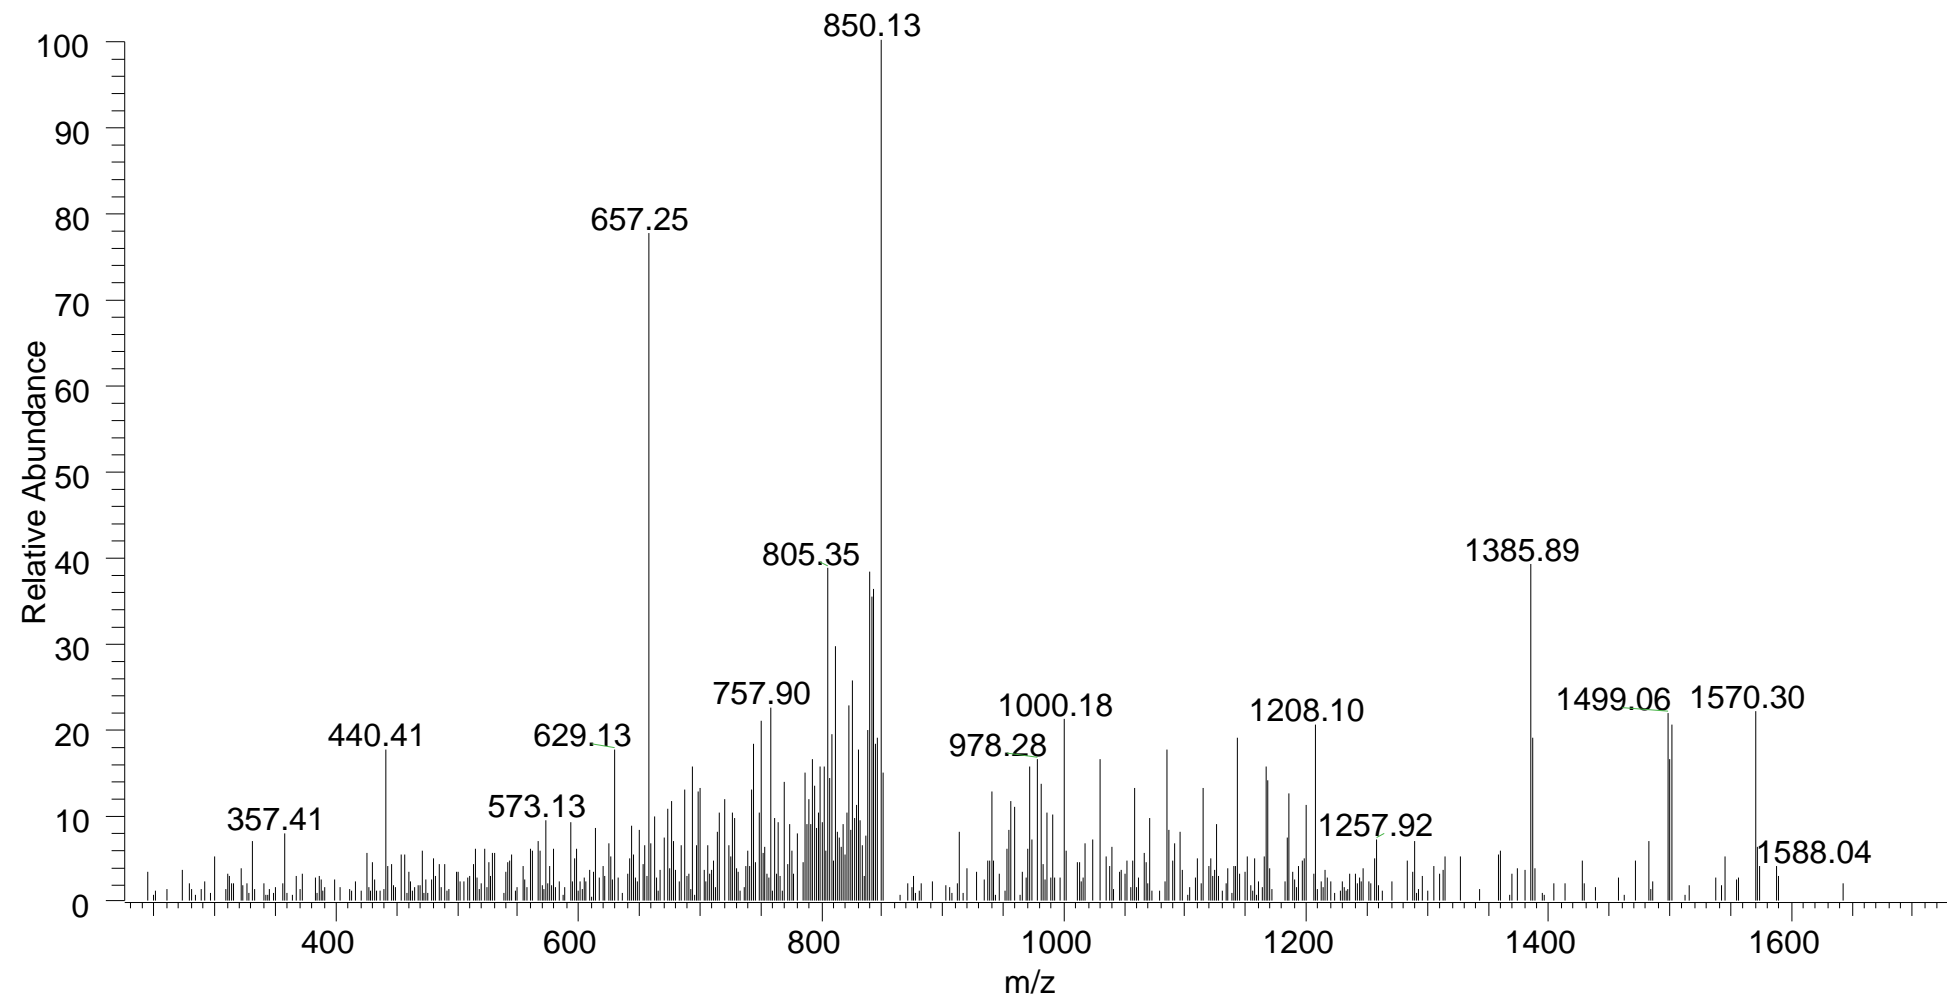

ESINANTYINQNLEK 875.9343 [M+2H]<sup>2+</sup>

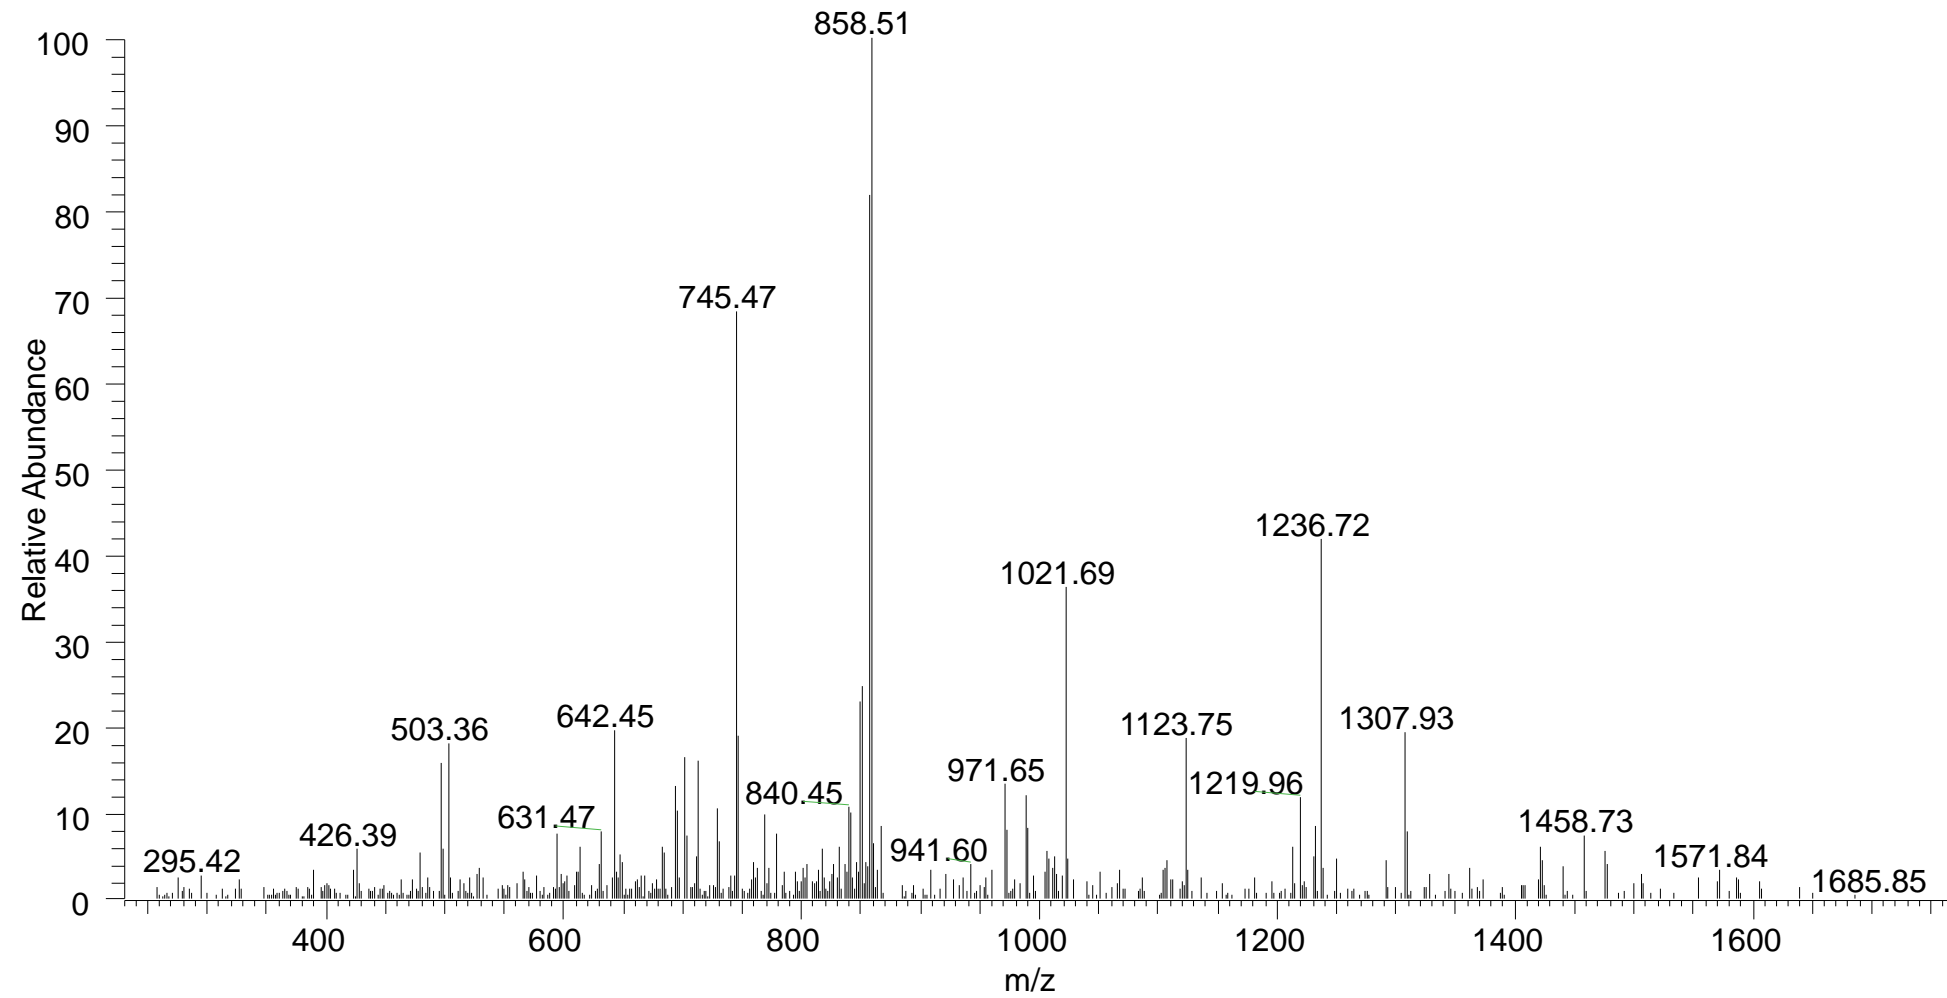

VAVLSTPLVTSFESK 789.4418 [M+2H]<sup>2+</sup>

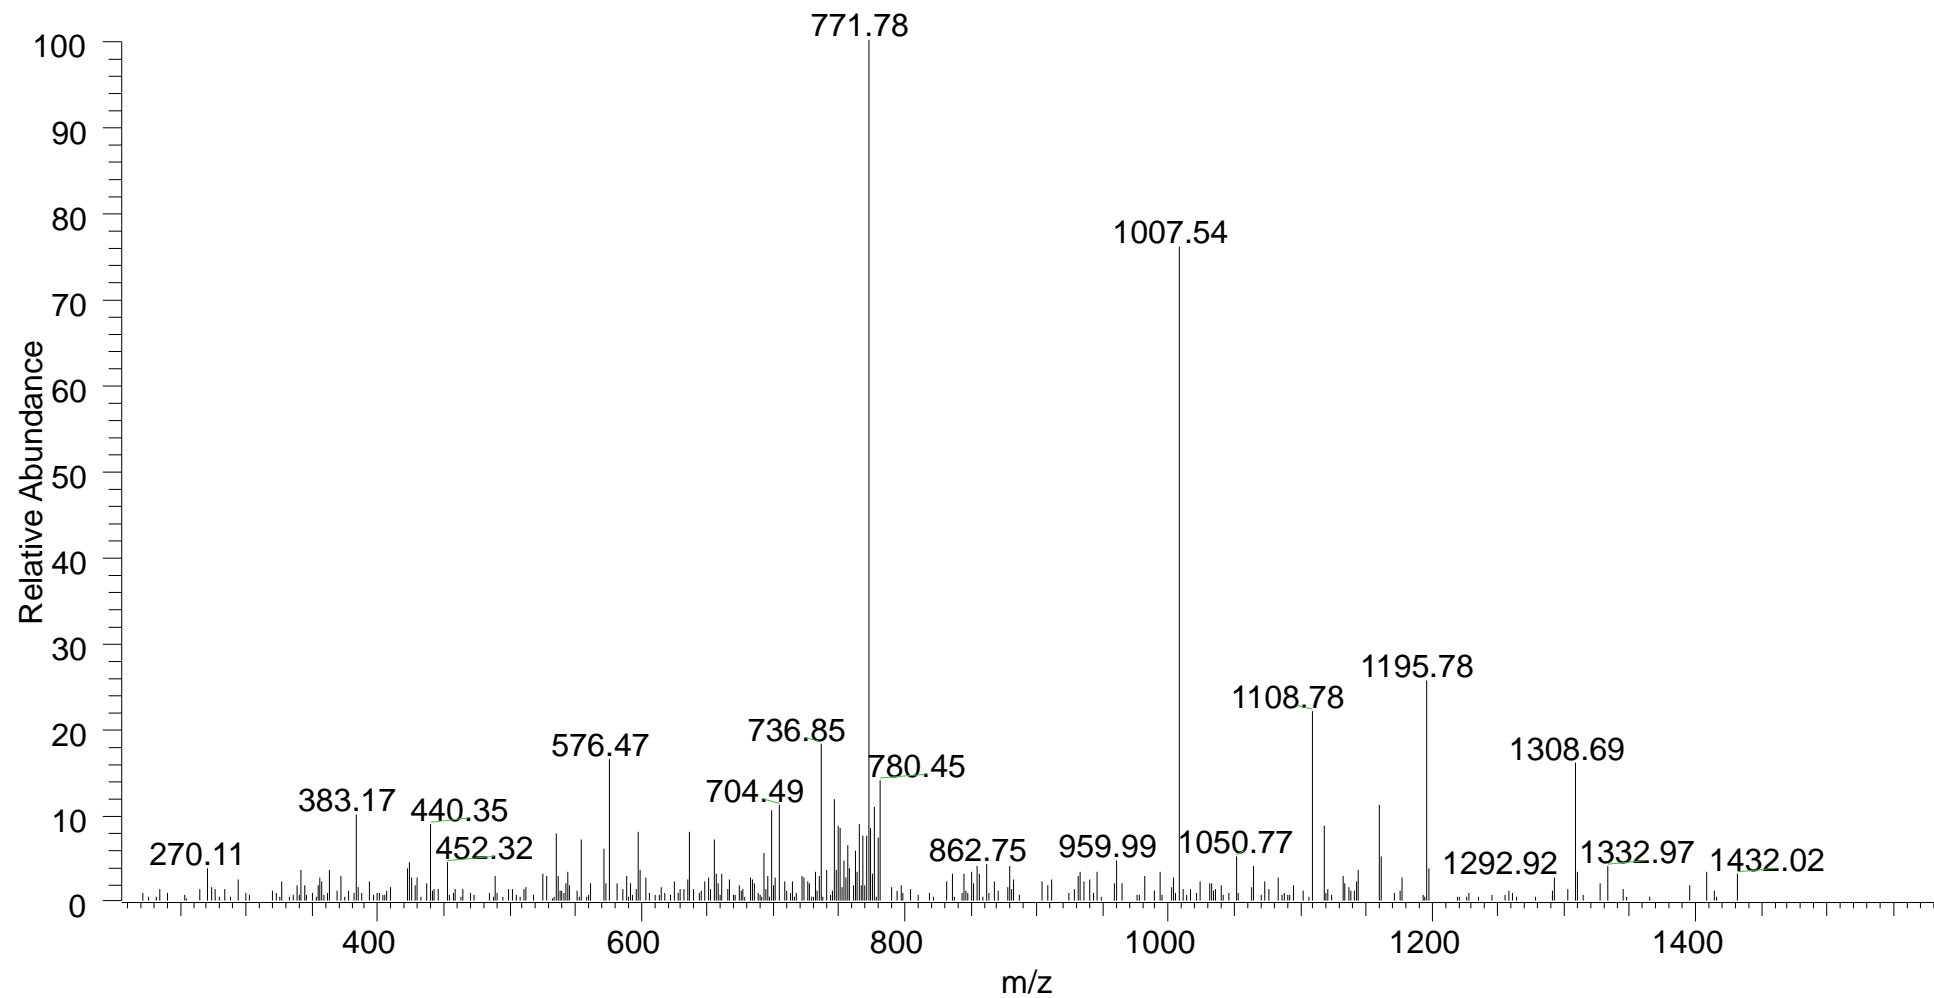



KDGEILFDAIDIYLRNK 675.0208 [M+2H]<sup>2+</sup>

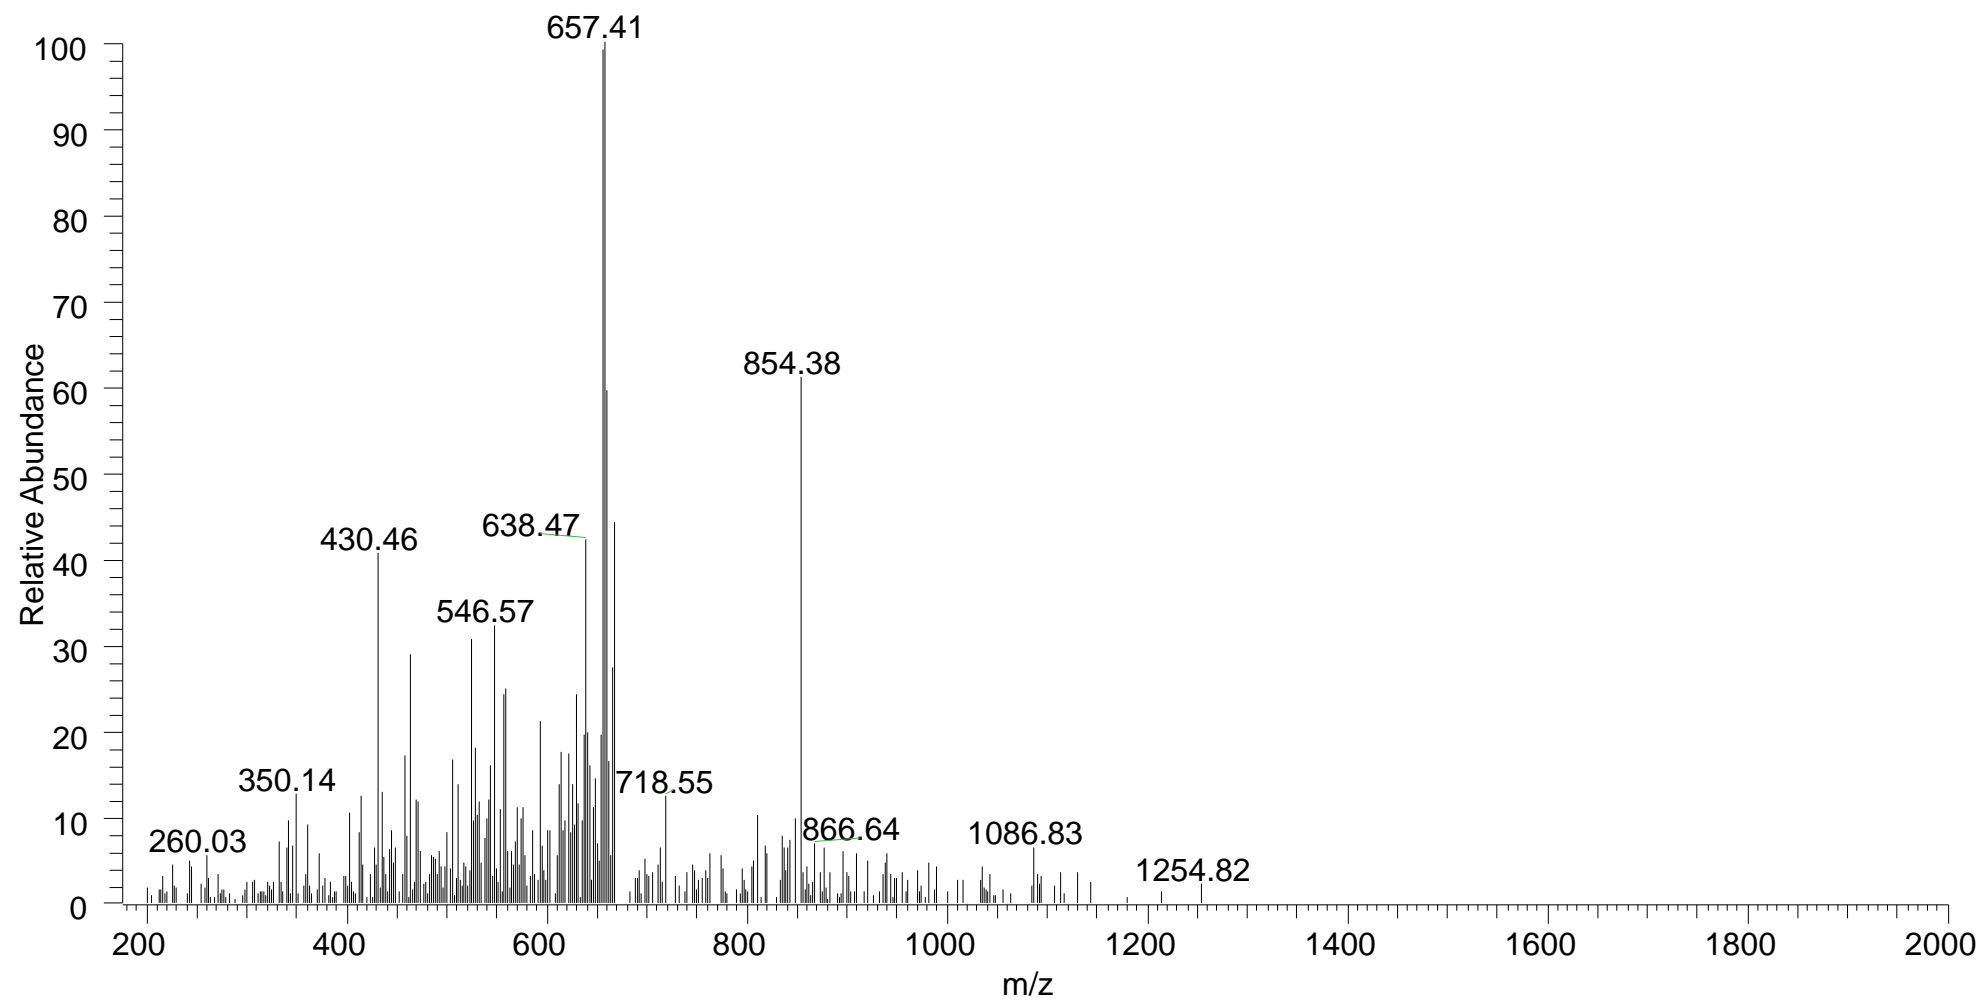

[42.01]MPVYKDGNTGKWFYFI 974.4655 [M+2H]<sup>2+</sup>

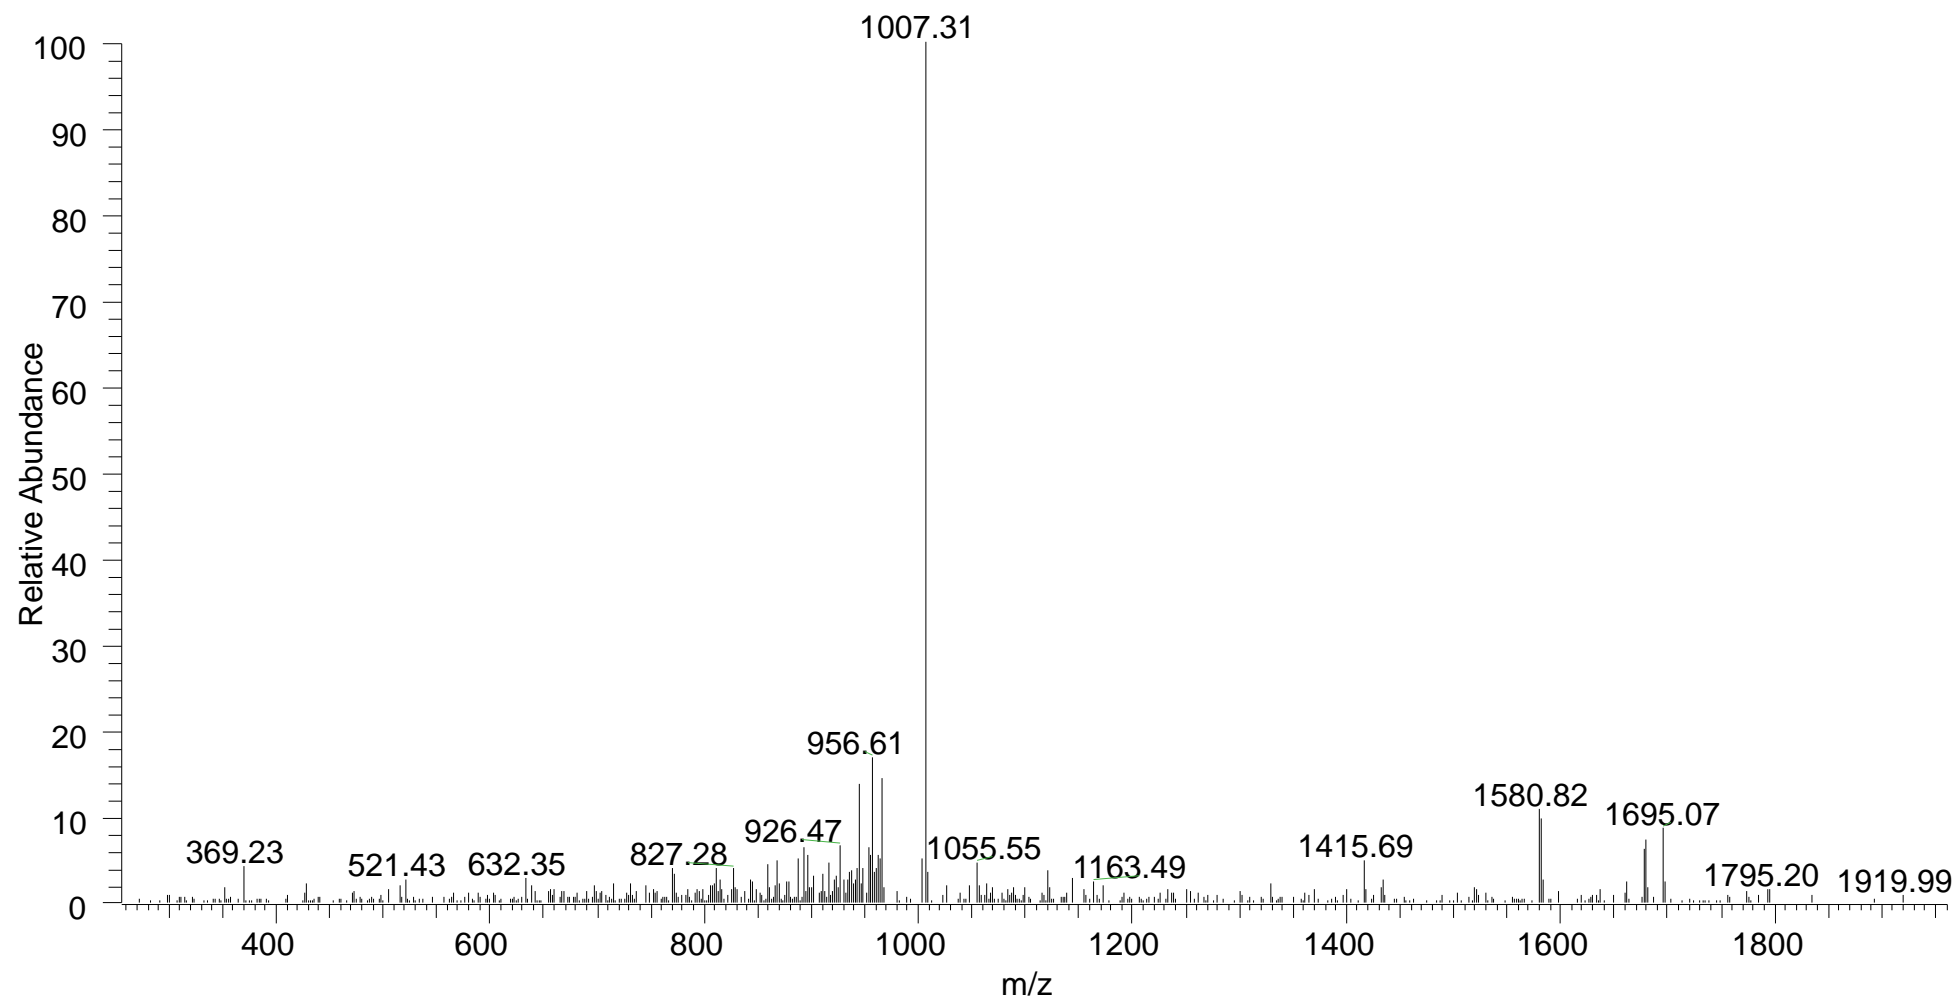

KTTSEALKEVLSDT 761.3987 [M+2H]<sup>2+</sup>

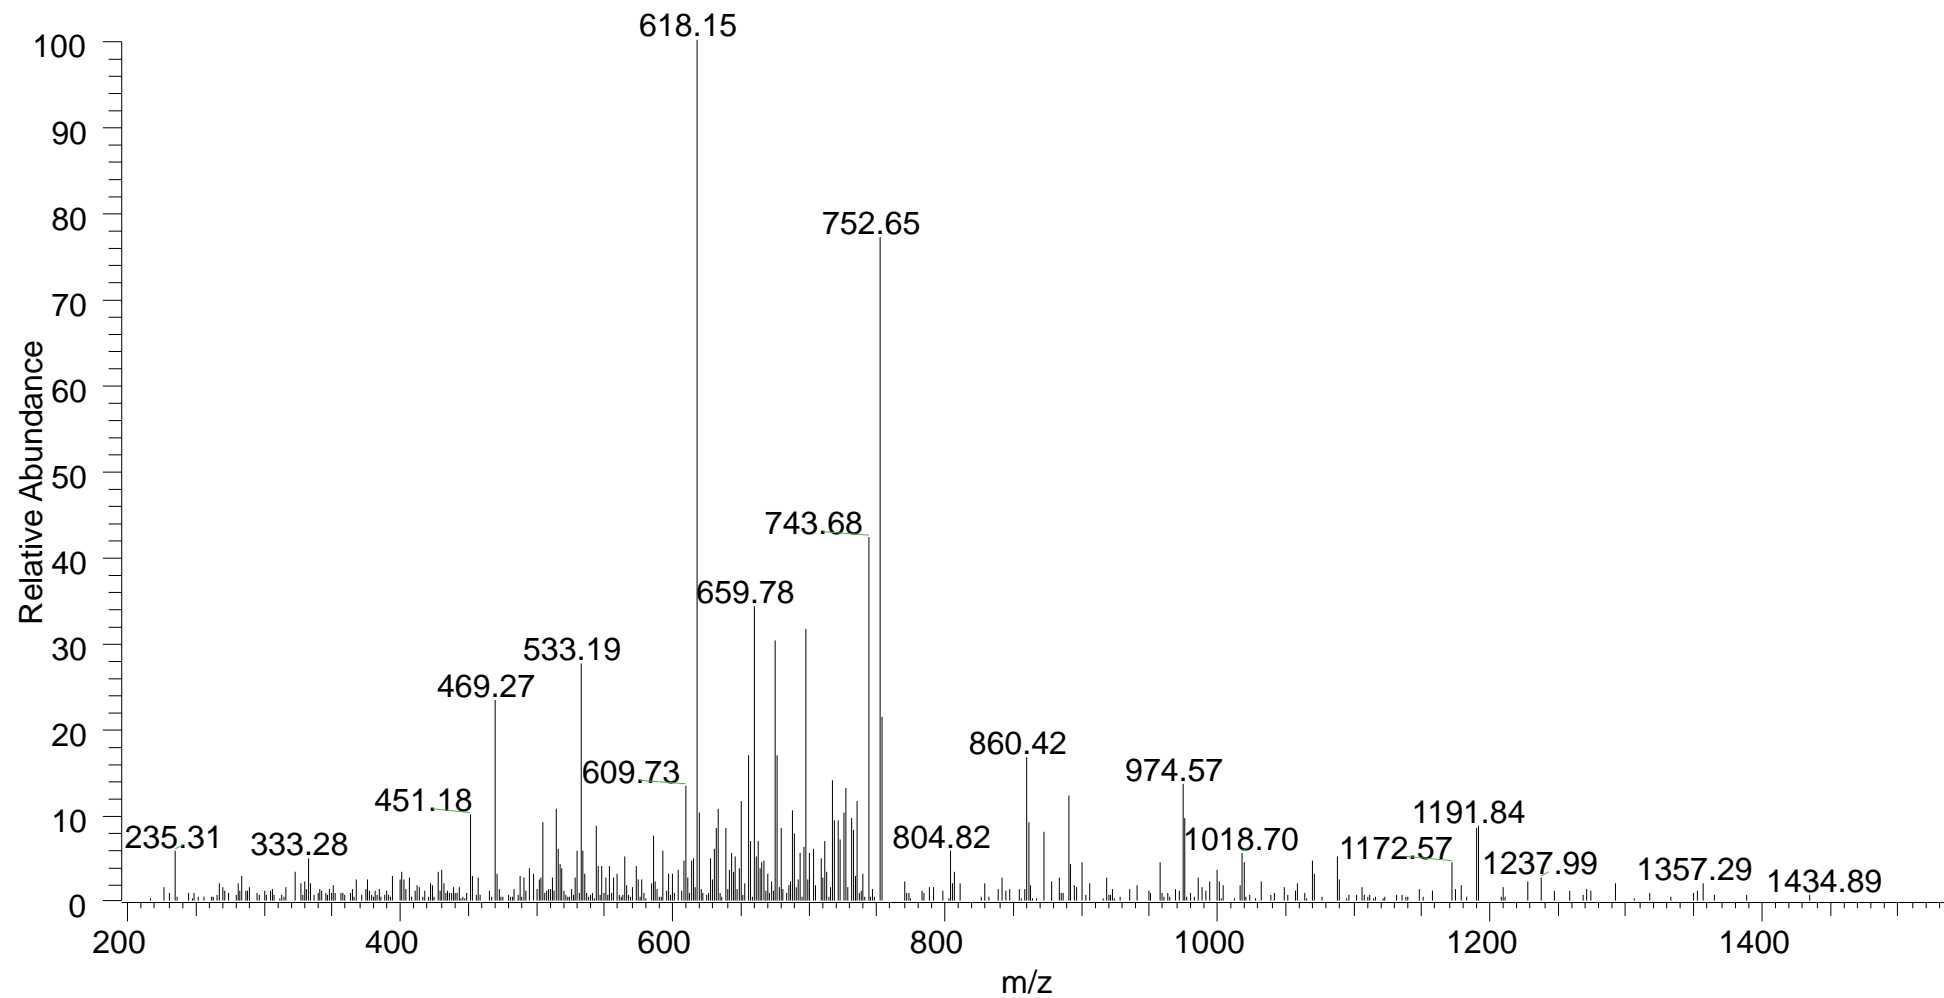

EPKPVDATGADDPLKPDDRMITNHFHANLVDQKVS<sup>Y</sup> 650.3128 [M+3H]<sup>3+</sup>

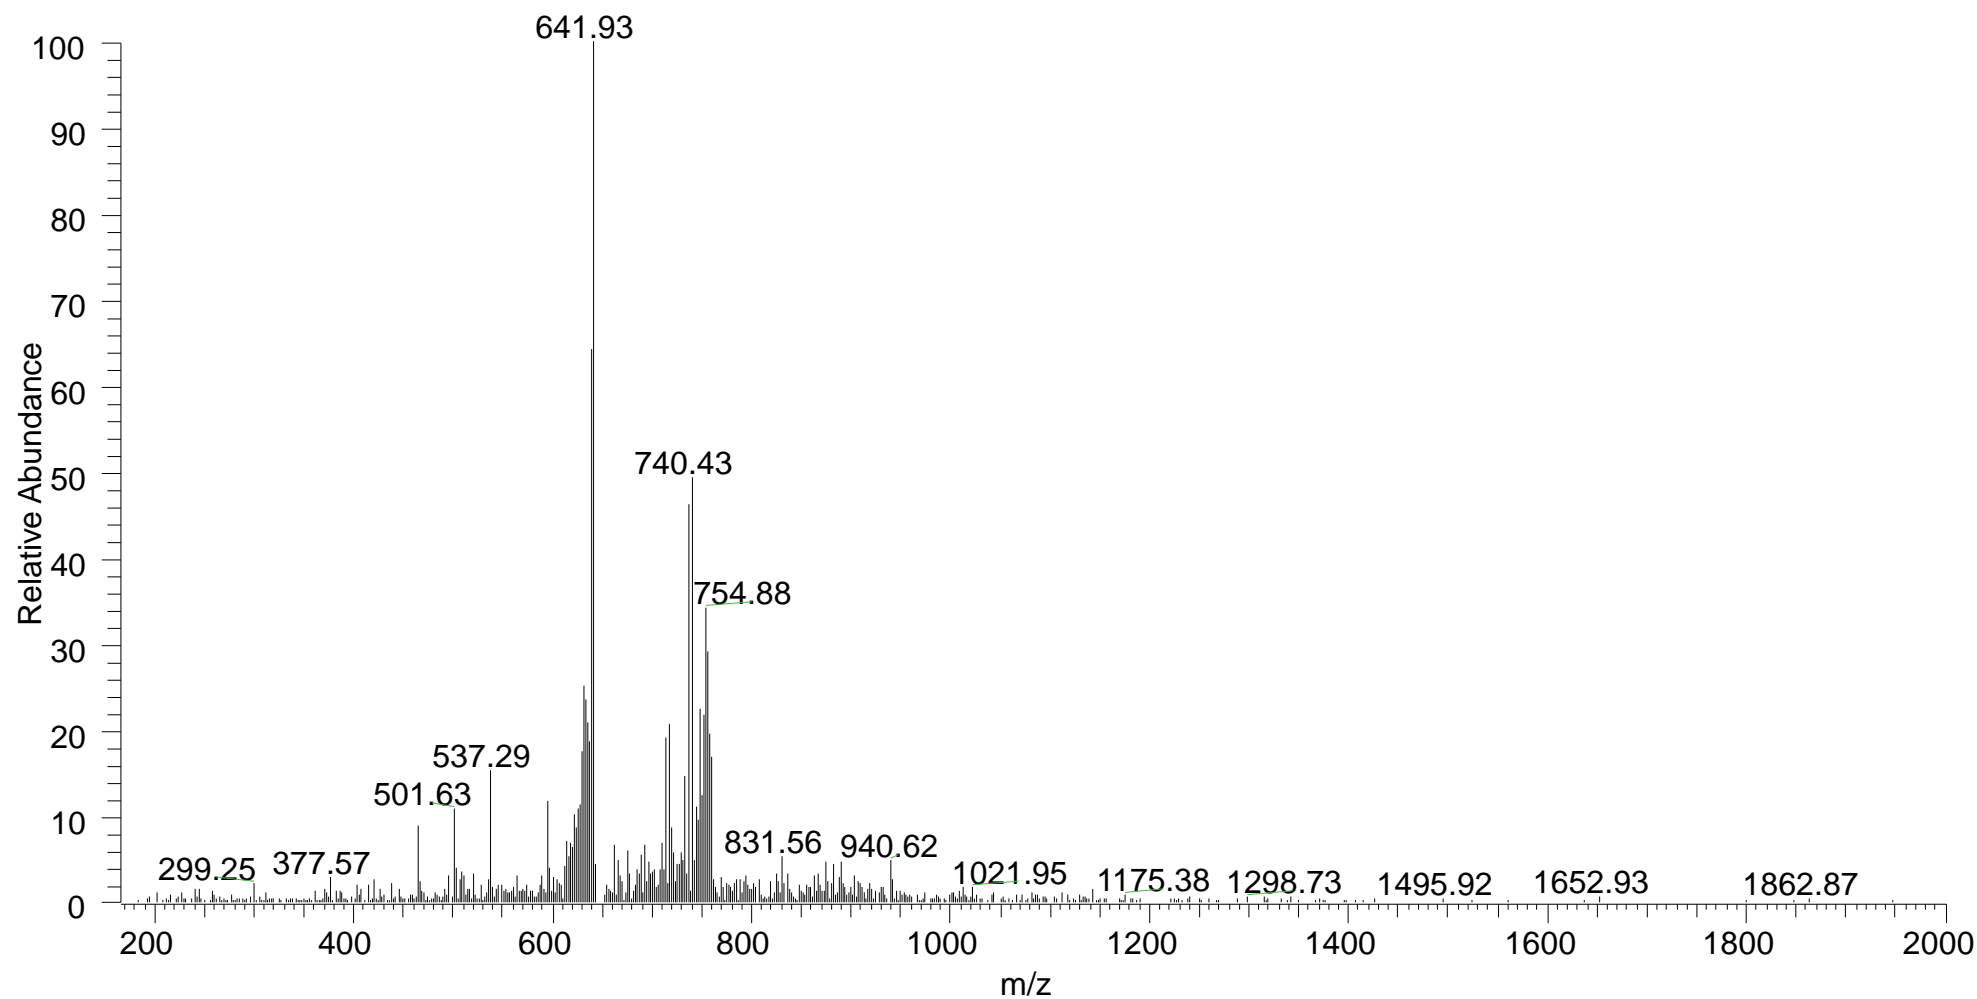

[42.01]MSHNALTTGIGIGAGAG 785.3987 [M+2H]<sup>2+</sup>

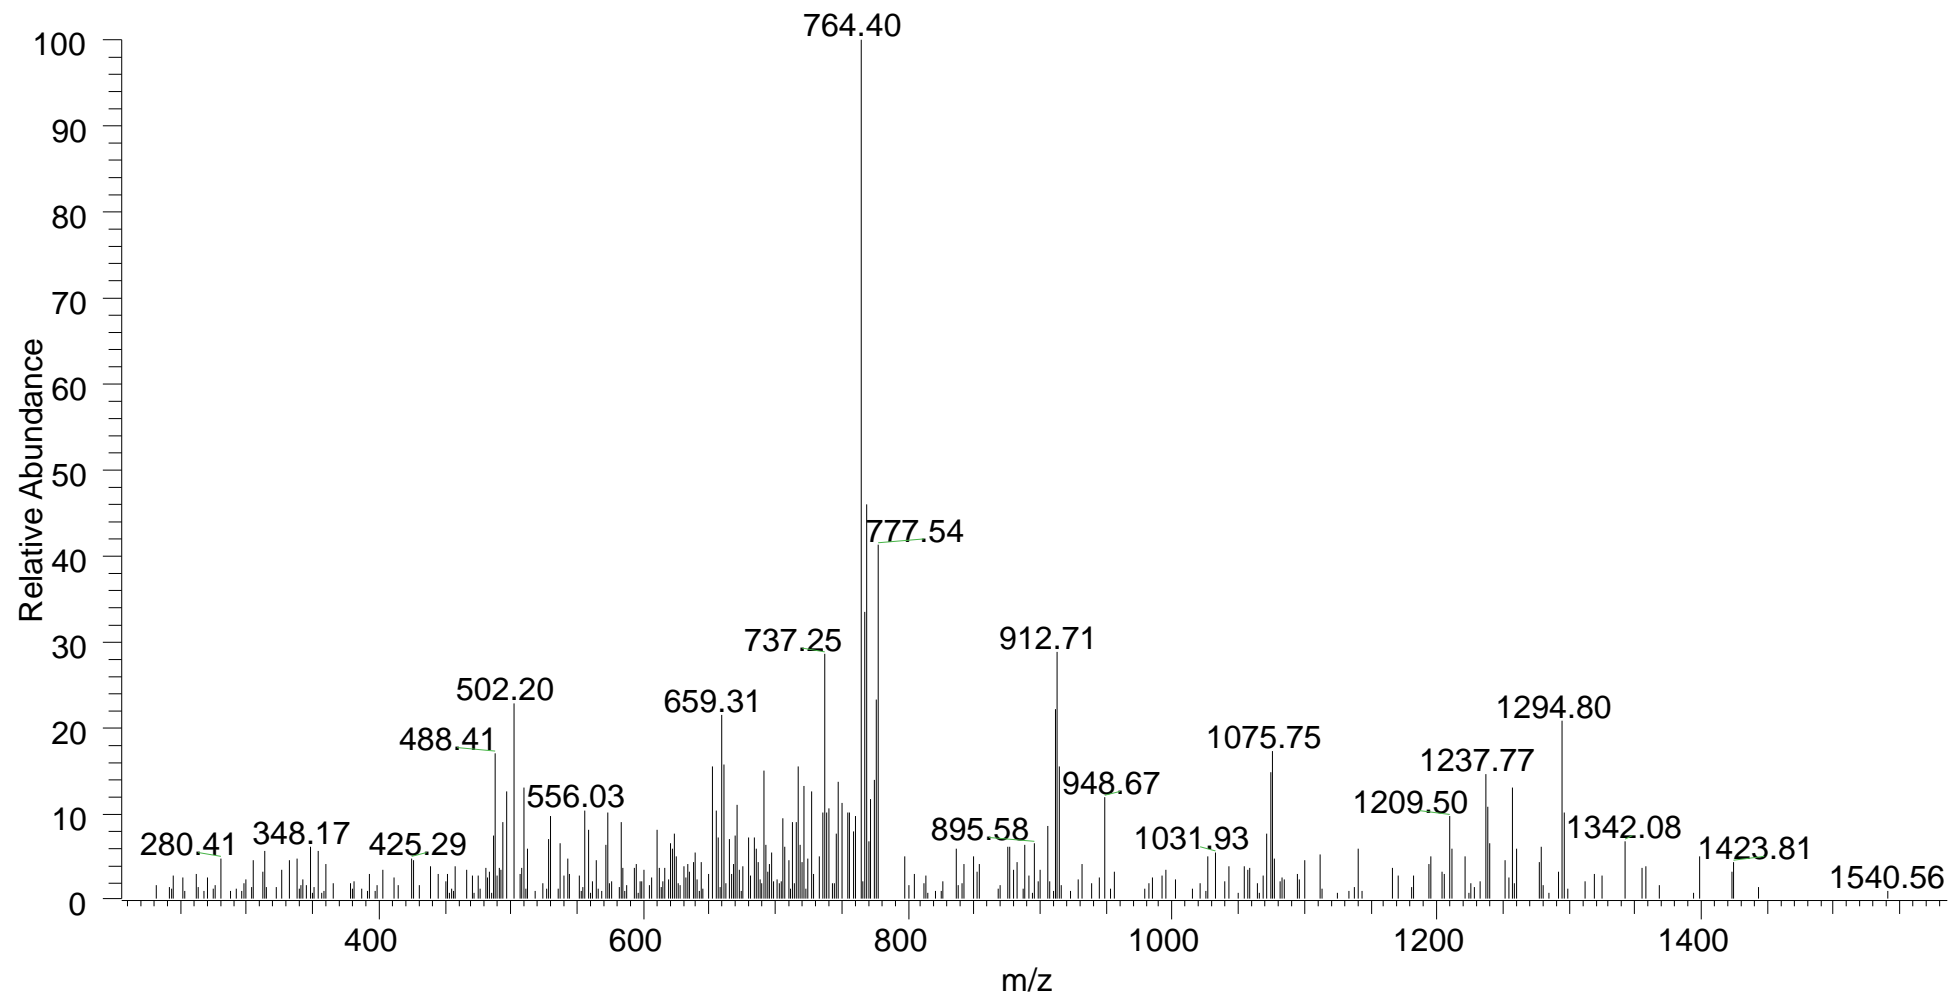

VQHPGKLVNKVM[147.04]SGLNINFGGGANATAK 946.8269 [M+2H]<sup>2+</sup>

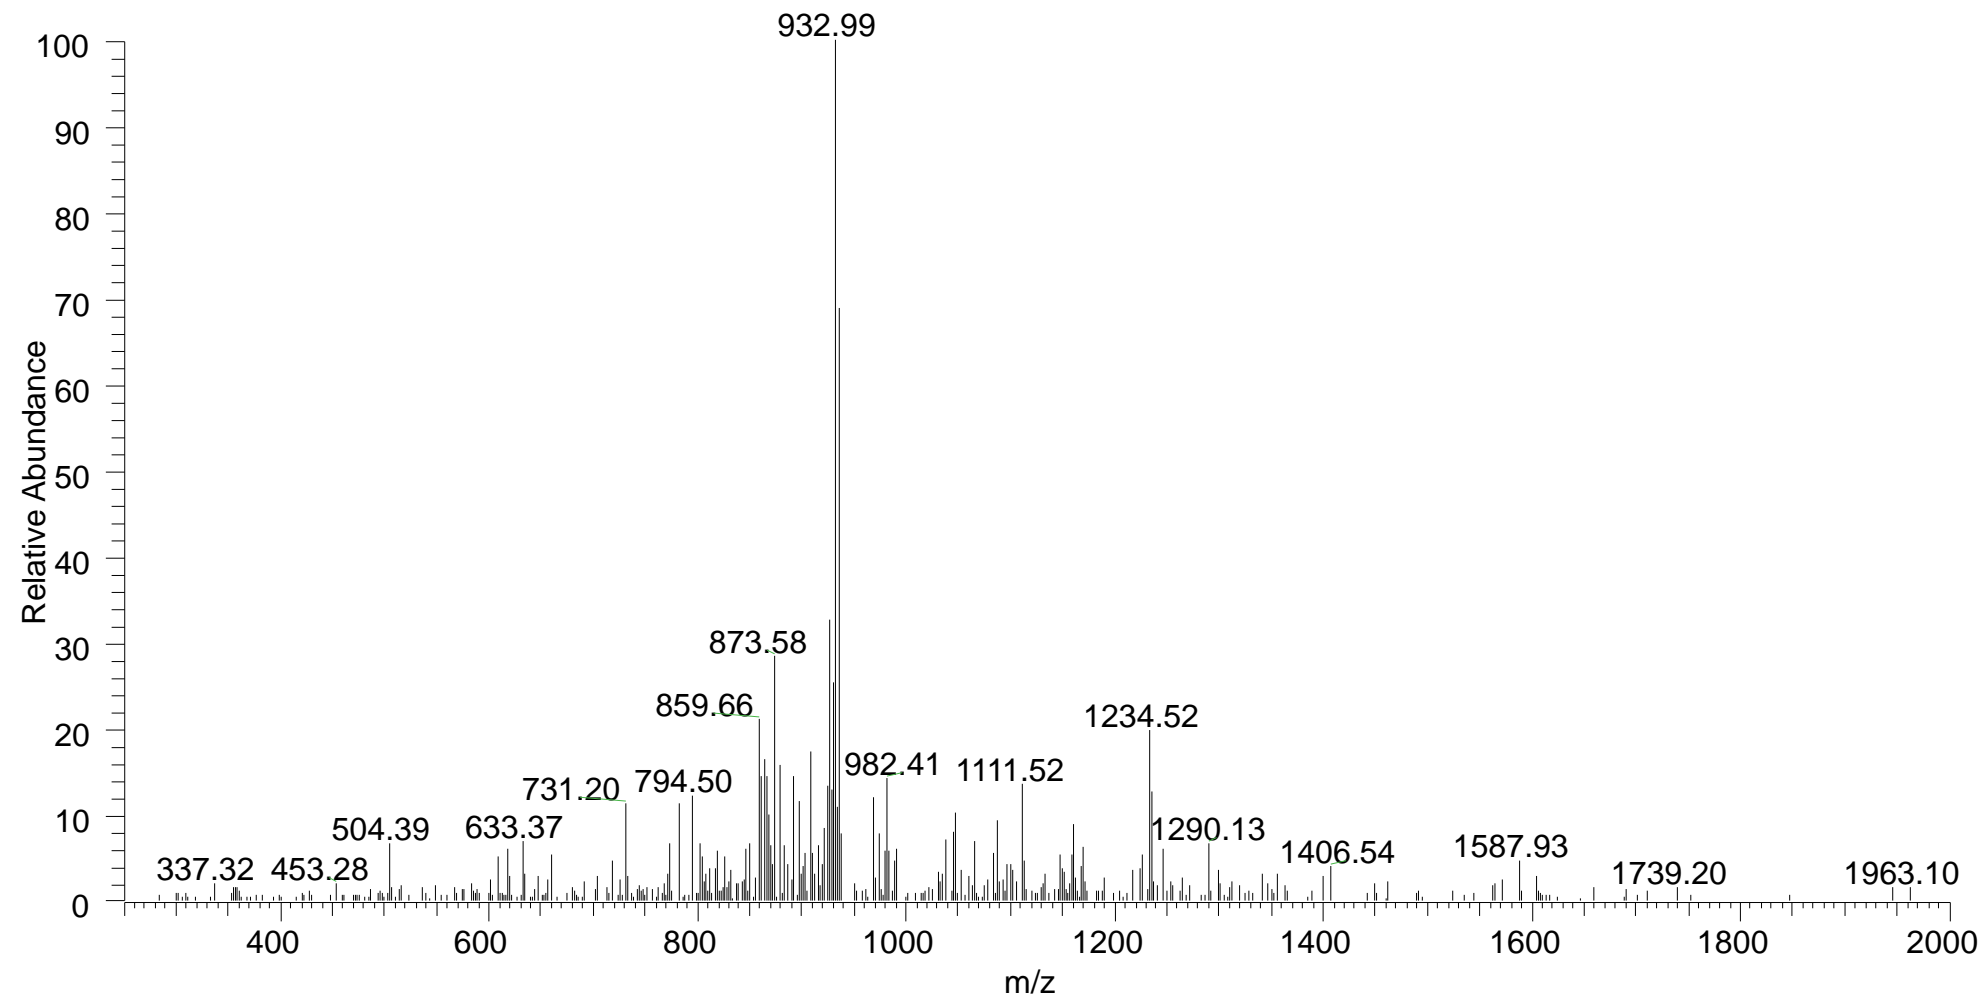

QM[147.04]MEGLSGVMDLAAVSGEDLGAVSDIVTDGLTAFGLKAKDSG 835.2061 [M+2H]<sup>2+</sup>

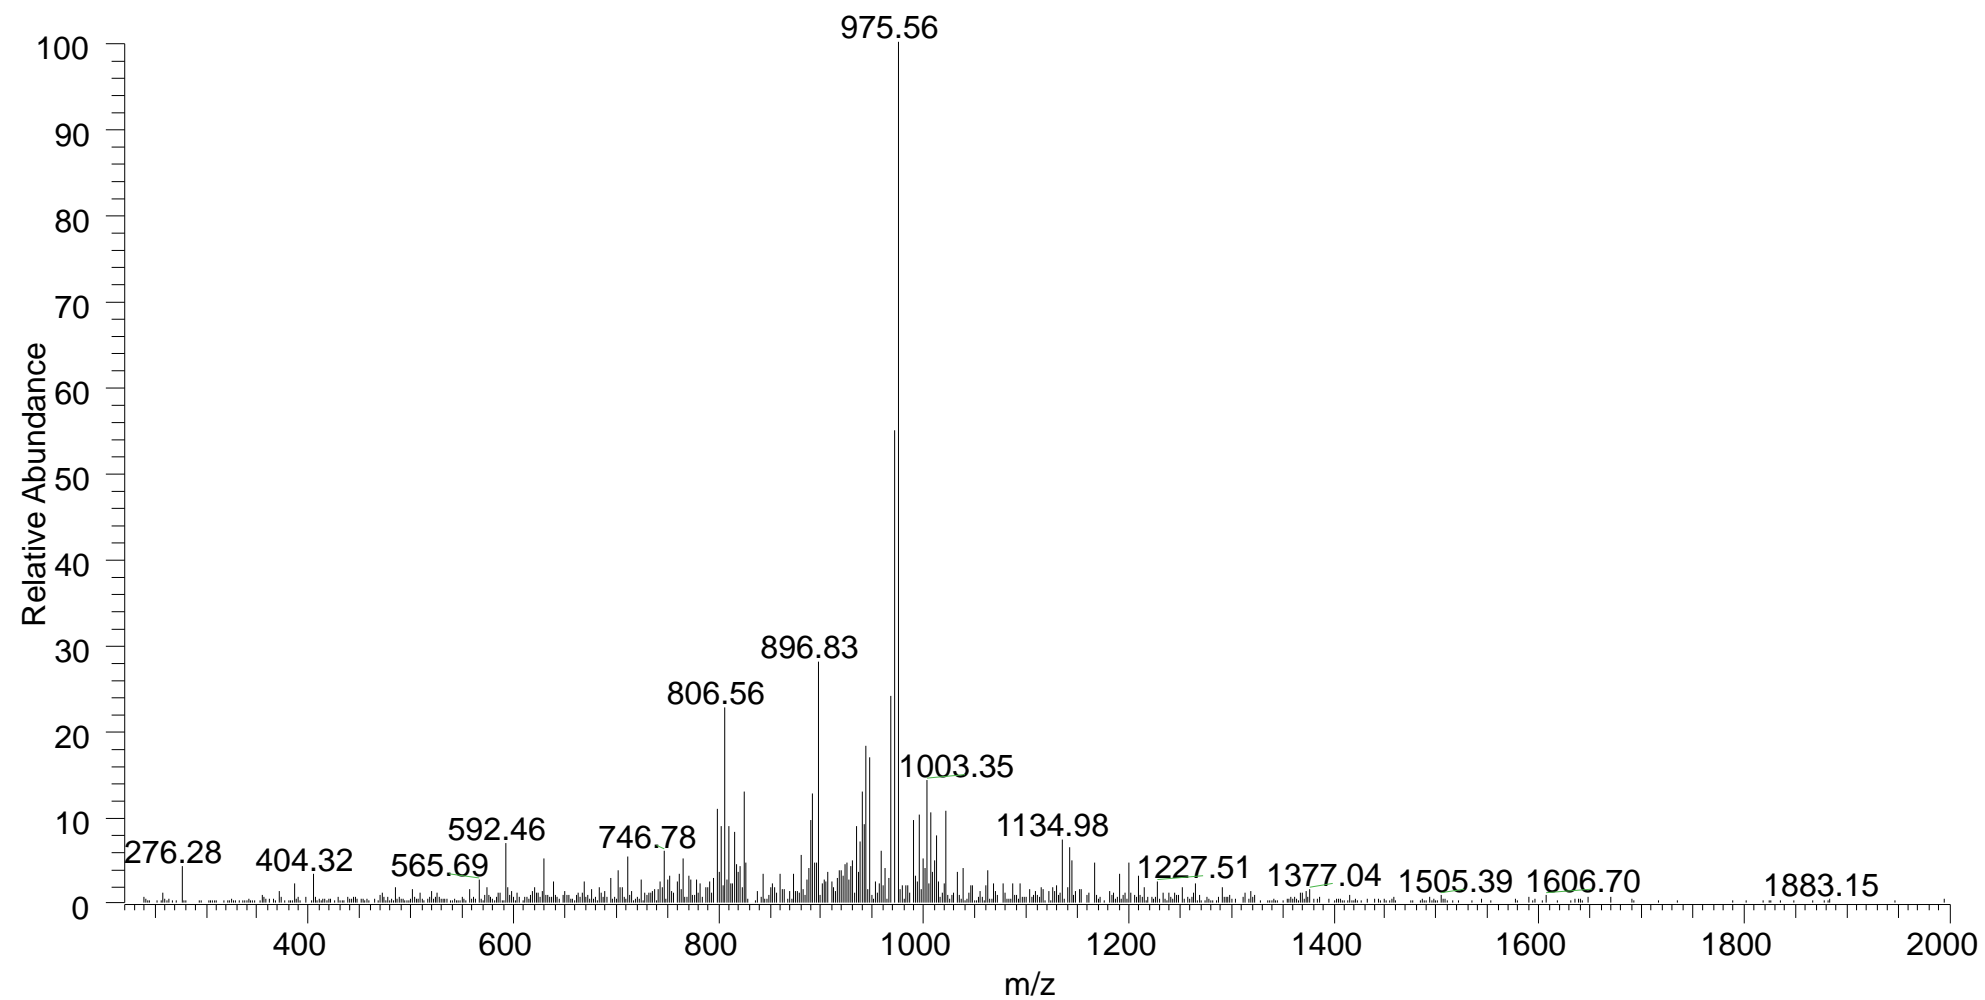

KSNVEAFSNAVK 647.3556 [M+2H]<sup>2+</sup>

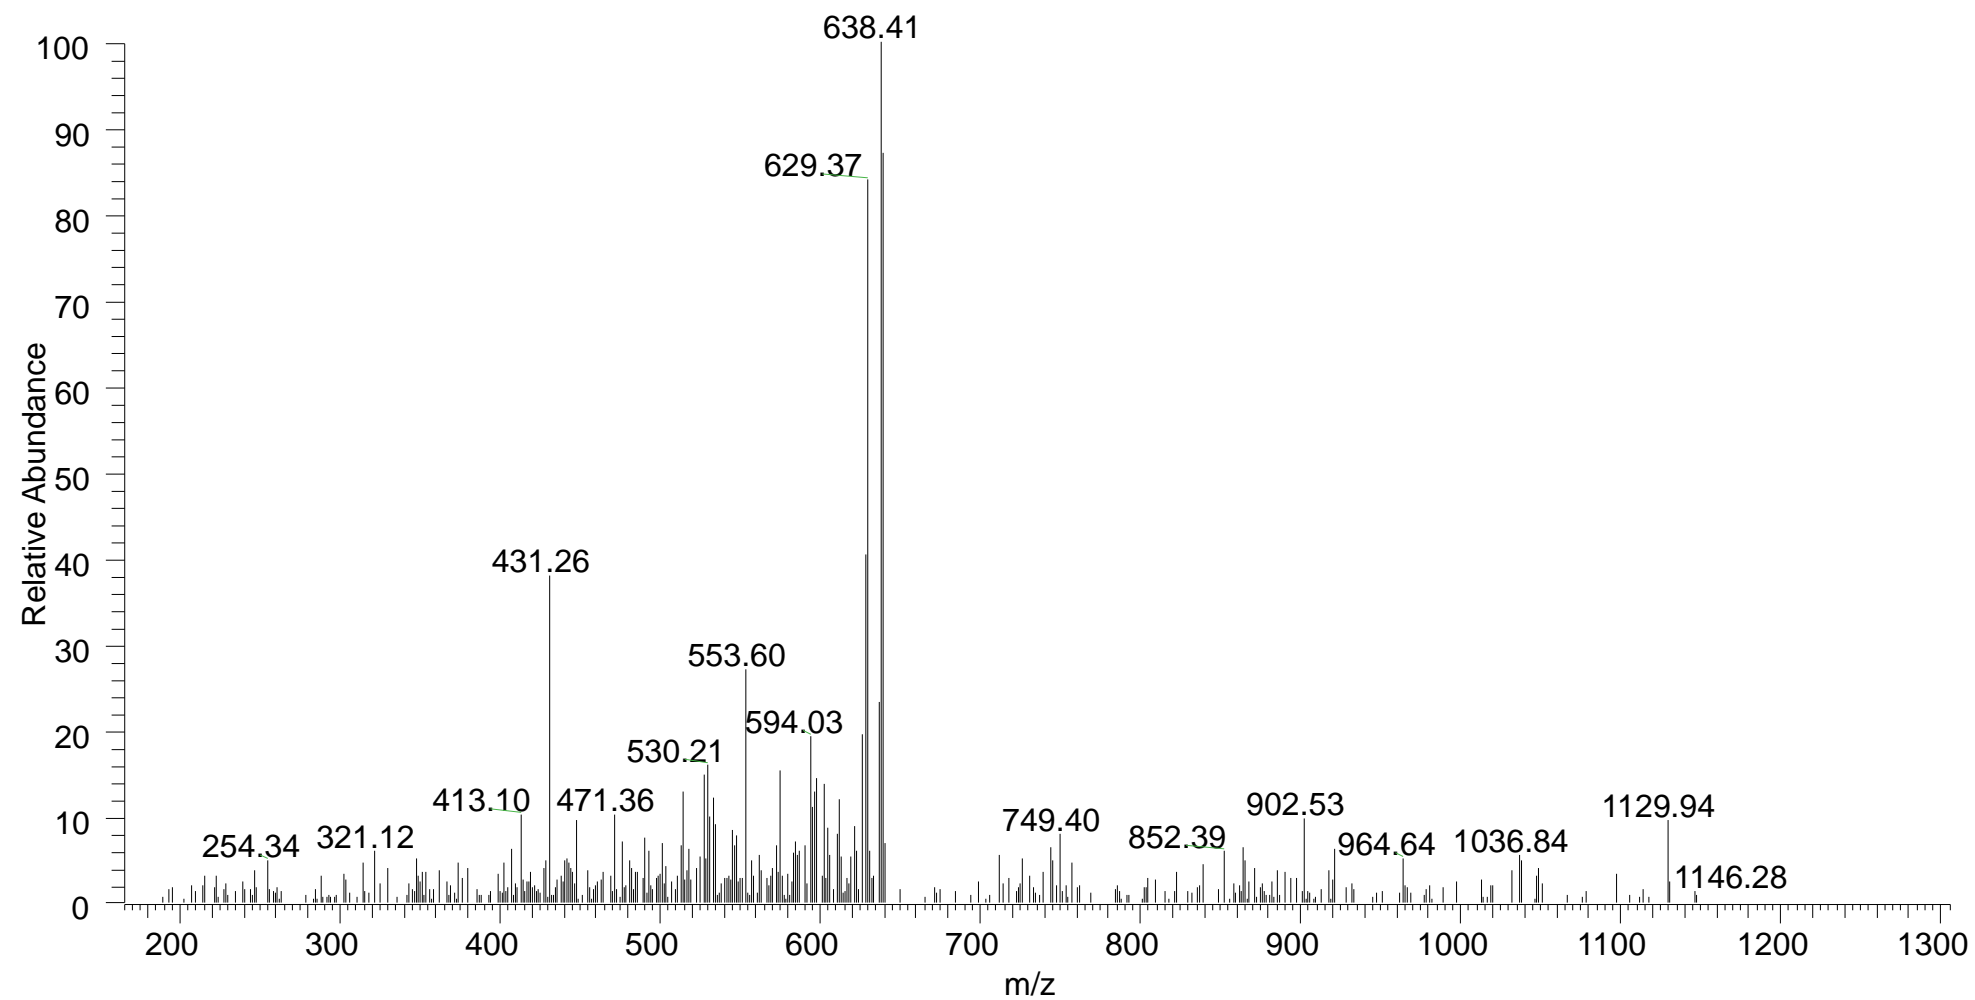



GMVASMQM<sup>+</sup>QVVQVNVLT<sup>+</sup>M[147.04]ELAQQNAML<sup>+</sup>TQQ<sup>+</sup>LTELK 785.1965 [M+2H]<sup>2+</sup>

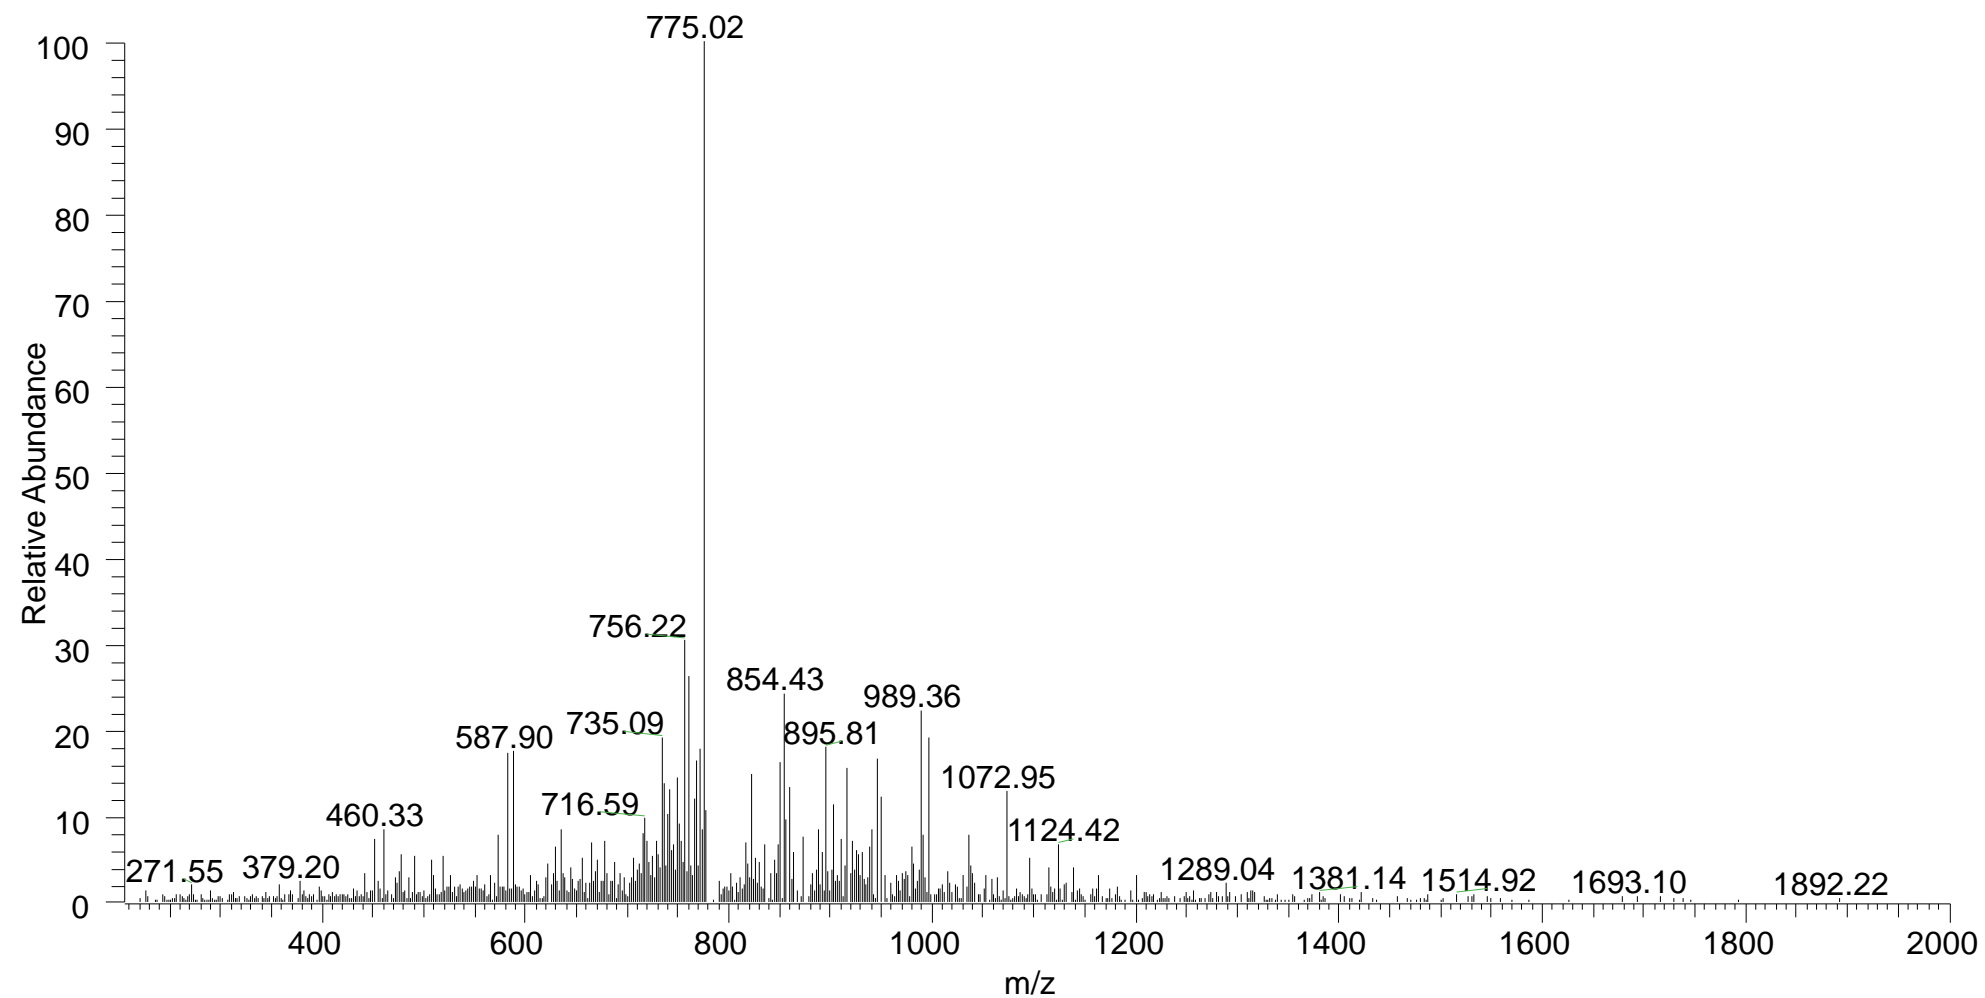

DIITVYC[160.03]PENGSTATDEY 980.9245 [M+2H]<sup>2+</sup>

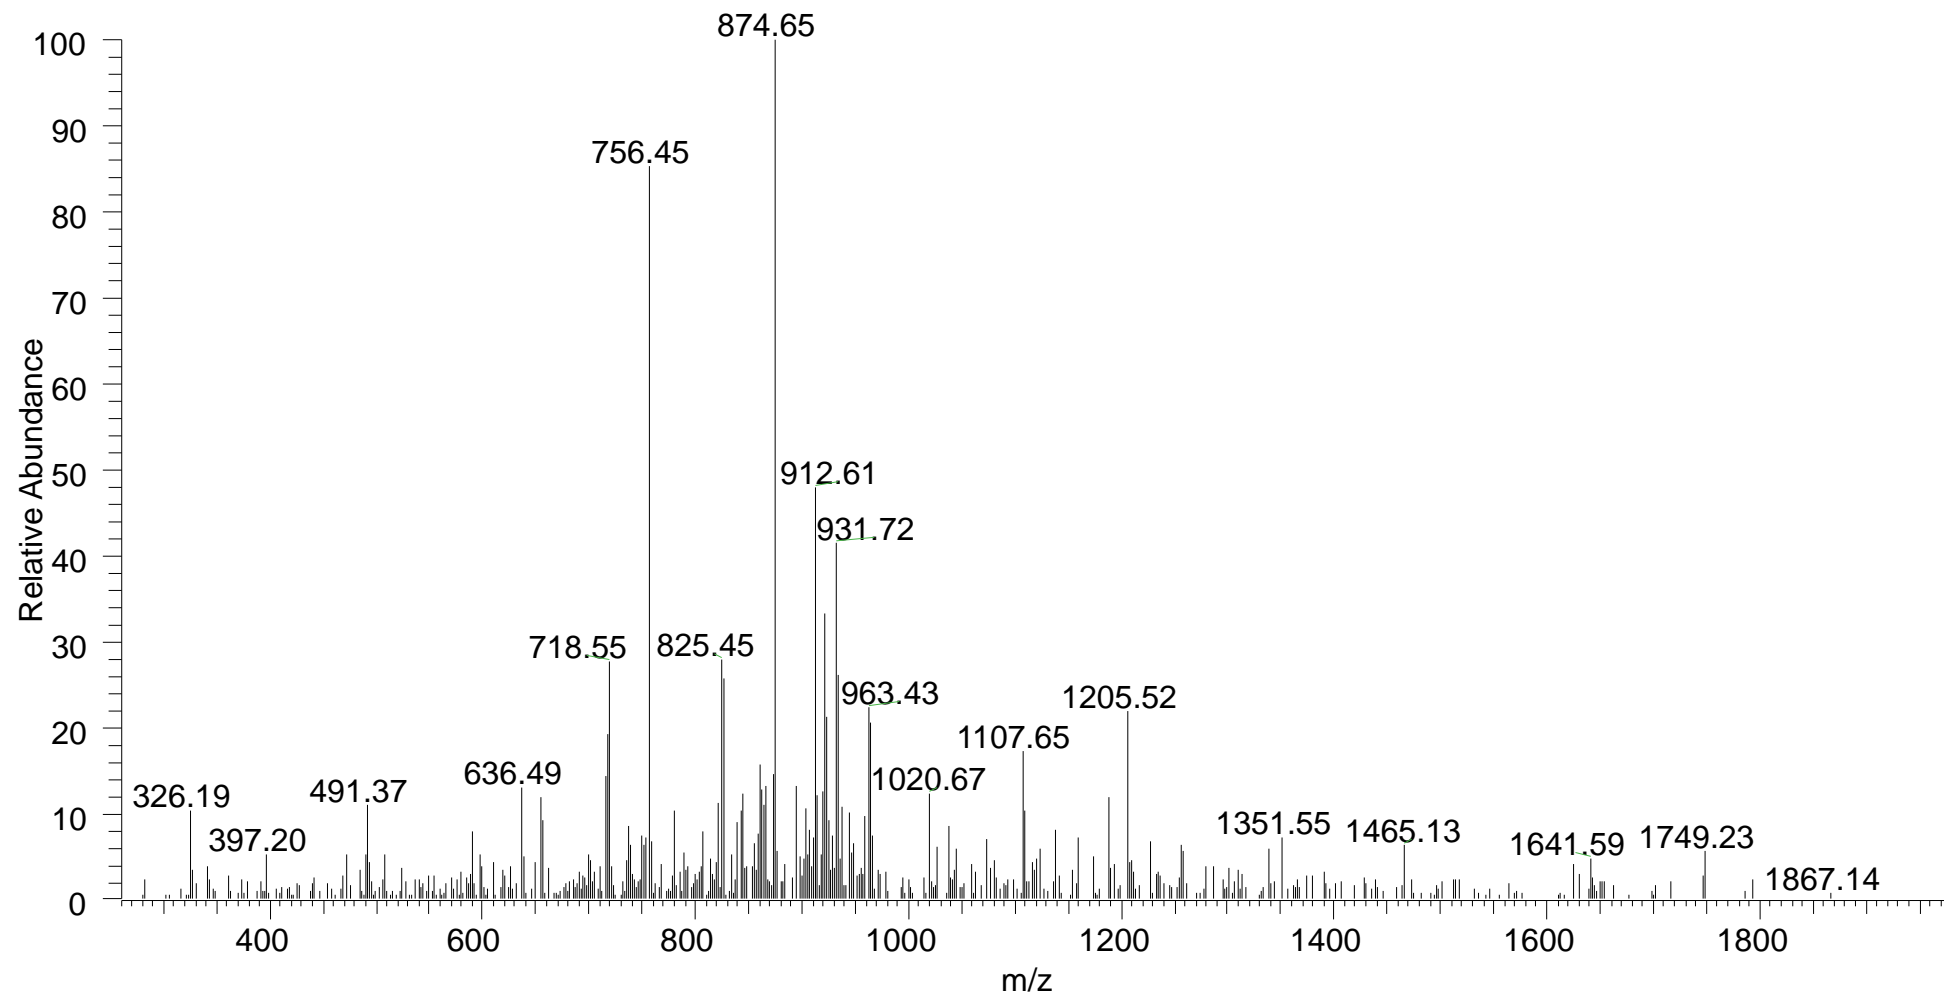

Supplement: s1 [file s1]
